# Supplementary material for: Scaling Up the Process of Titanium Dioxide Nanotube Synthesis and Its Effect on Photoelectrochemical Properties
Source: MDPI journal article supplement (doi:10.3390/ma14195686), 2021-09-29
Supplement: s1 [file s1]

## Supplementary Information

# Scaling-up of the process of titanium dioxide nanotubes synthesis and its effect on photoelectrochemical properties

Mariusz Szkoda <sup>1,2\*</sup>, Konrad Trzcíński <sup>1</sup>, Zuzanna Zarach <sup>1</sup>, Daria Roda <sup>1</sup>, Marcin Łapiński <sup>2,3</sup> and Andrzej P. Nowak <sup>1</sup>

<sup>1</sup> Faculty of Chemistry, Department of Chemistry and Technology of Functional Materials, Gdańsk University of Technology, Narutowicza 11/12, 80-233, Gdańsk, Poland

<sup>2</sup> Advanced Materials Center, Gdańsk University of Technology, ul. Narutowicza 11/12, 80-233, Gdańsk, Poland

<sup>3</sup> Advanced Materials Center, Gdańsk University of Technology, ul. Narutowicza 11/12, 80-233, Gdańsk, Poland

\* Correspondence: mariusz-szkoda1@pg.edu.pl; Tel.: +48 58 348 64 34 (MS)

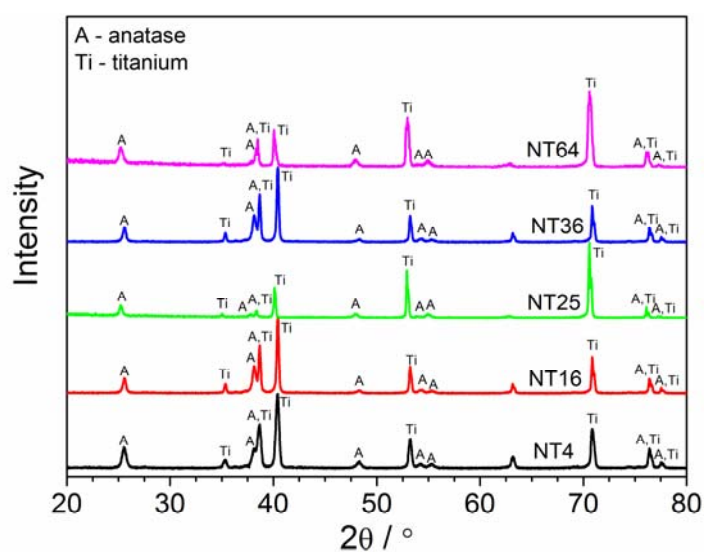

Figure S1. Comparison of XRD patterns of TiO<sub>2</sub> samples.

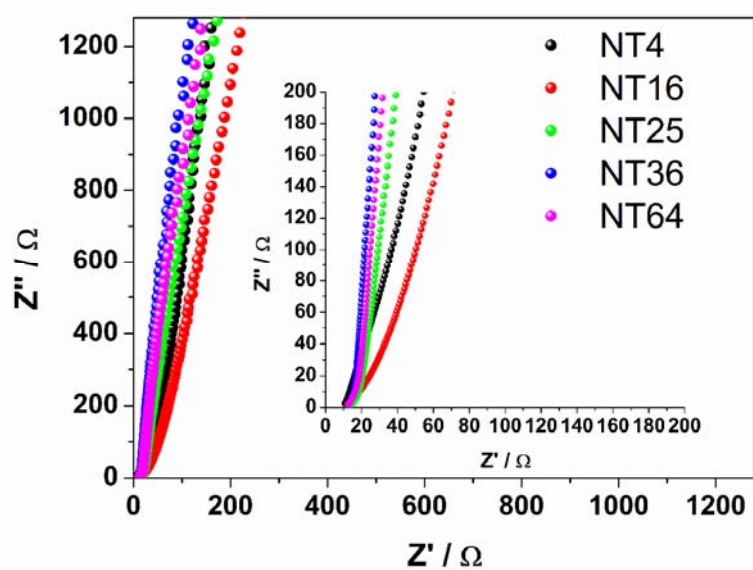

Figure. S2. EIS spectra of the analyzed samples, performed in 0.2M K<sub>2</sub>SO<sub>4</sub>.

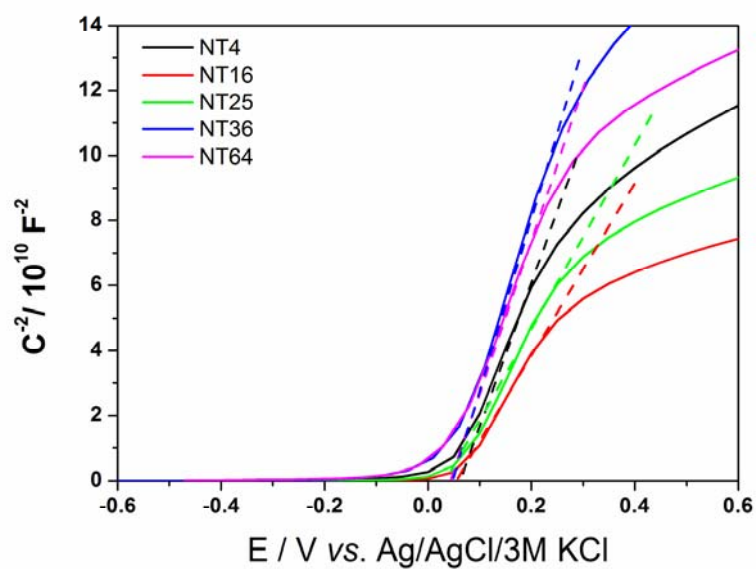

Figure. S3. The Mott-Schottky plot for obtained electrodes.
